# Supplementary material for: Luminescent 3-hydroxyflavone nanocomposites with a tuneable refractive index for photonics and UV detection by plasma assisted vacuum deposition
Source: Royal Society of Chemistry journal article supplement (doi:10.1039/c4tc00294f), 2014-01-01
Supplement: c4tc00294f1.pdf [file c4tc00294f1.pdf]

## Supporting Information

# Luminescent 3-Hydroxyflavone nanocomposites with tuneable refractive index for photonics and UV detection by plasma assisted vacuum deposition

Francisco J. Aparicio<sup>a\*</sup>, María Alcaire<sup>a</sup>, Ana Borrás<sup>a</sup>, Juan C. González<sup>a</sup>,  
Fernando López-Arbeloa<sup>b</sup>, Iwona Blaszczyk-Lezak<sup>a</sup>, Agustín R.  
González-Elípe<sup>a</sup> and Angel Barranco<sup>a\*</sup>

<sup>a</sup>Consejo Superior de Investigaciones Científicas. Instituto de Ciencia de Materiales de Sevilla (CSIC-Universidad de Sevilla-Junta de Andalucía), c/Américo Vespucio 49, 41092 Sevilla, Spain. Email fjaparicio@icmse.csic.es (F.J. Aparicio) and angel.barranco@csic.es (A. Barranco).

<sup>b</sup>Departamento de Química Física. Universidad del País Vasco UPV/EHU, Apartado 644, 48080-Bilbao, Spain

### S1. Geometrical Configurations used for the Deposition.

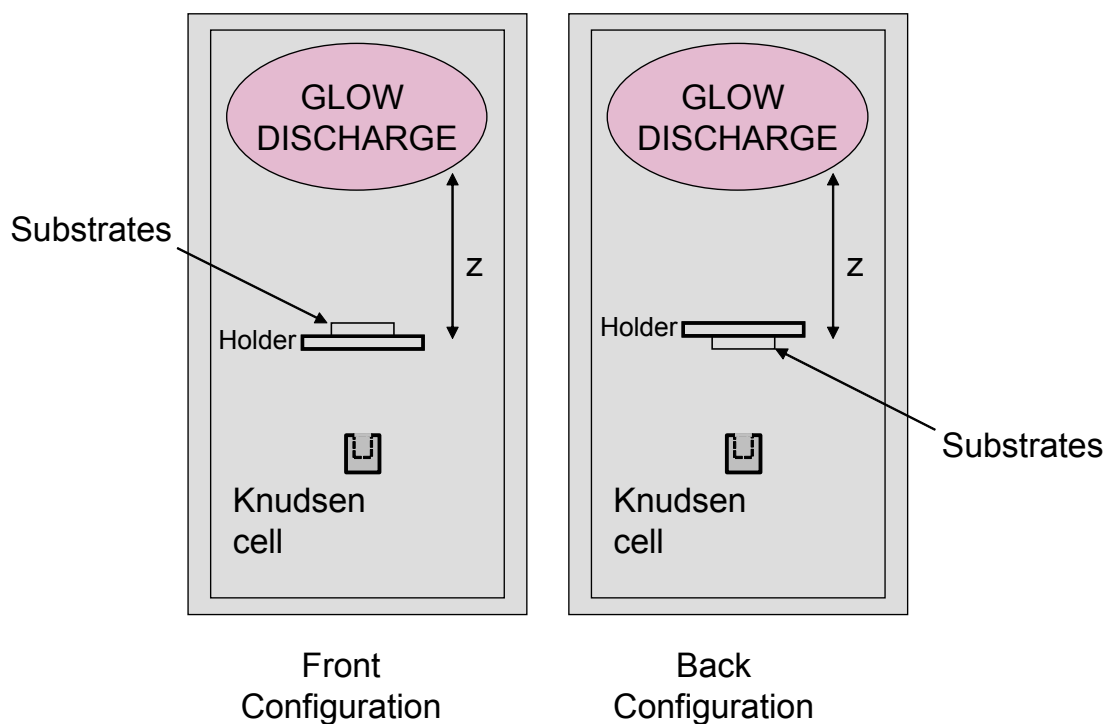

**Fig. S1.** Schematic representation of the front and back configurations used for the deposition of the films.

## S2. Quantum yield determination.

The external quantum efficiency of the films ( $\eta$ ) has been determined by an absolute method that makes use of an integrating sphere.<sup>1</sup> As indicated in Equations S1 this is calculated from the intensity absorbed by the whole system. The samples analysed in the article consist of a non-luminescent organic matrix containing luminescent dye molecules. In this system the absorption band of the dye molecules and of the plasma polymeric matrix overlap. Thus the quantum yield ( $\Phi$ ) of the dye molecules embedded in the films has to be calculated by applying a correction factor corresponding to the percentage of light absorbed by the active dye molecules in relation to the absorption in the whole film (Eq. S1).

$$\left. \begin{aligned} \eta &= \frac{I_E}{I_{A(film)}} \Rightarrow I_E = \eta \cdot I_{A(film)} \\ \Phi &= \frac{I_E}{I_{A(dye)}} \end{aligned} \right\} \Rightarrow \Phi = \eta \cdot \left( \frac{I_{A(film)}}{I_{A(dye)}} \right) \quad (S1)$$

$\eta$  = External radiative efficiency of the film (sphere measurement)

$\Phi$  = Dye quantum yield

$I_E$  = Emission Intensity

$I_{A(film)}$  = Intensity absorbed by the whole sample

$I_{A(dye)}$  = Intensity absorbed by the trapped dye molecules

In order to determine the correction factor  $I_{A(dye)}/I_{A(film)}$  we consider an infinitesimal layer at a depth  $z$  within the sample. Within this layer the infinitesimal intensity absorbed by the dye molecules is given by Eq. S2.

$$dI_{A(dye)} = \alpha_{dye}' \cdot I(z) \cdot dz \quad (S2)$$

Being  $\alpha_{dye}'$  the attenuation or absorption coefficient associated to the dye molecules. The superscript indicates that the base  $e$  convection is used.  $I(z)$  is the intensity of the photon beam at a depth  $z$  within the sample. This follows the Beer–Lambert law (Eq. S3).

$$I(z) = I_0 e^{-\alpha_{film} \cdot z}$$

(S3)

Note that  $\alpha_{film}$  corresponds to the absorption coefficient of the whole system (dye molecules and plasma polymeric matrix). Meanwhile  $I_0$  is the intensity of the incident beam. By substituting (S3) in (S2) and integrating (S2) along the film thickness ( $t$ ) we obtain the intensity absorbed by the dye molecules  $I_{A(dye)}$ .

$$I_{A(dye)} = \frac{\alpha_{dye}}{\alpha_{film}} \cdot I_0 \left( 1 - e^{-\alpha_{film} \cdot t} \right) = \frac{\alpha_{dye}}{\alpha_{film}} \cdot I_{A(film)}$$

(S4)

Where  $I_{A(film)}$  is the intensity absorbed by the film. Thus the percentage of photons absorbed by the dye molecules  $I_{A(dye)}/I_{A(film)}$  is equal to the ratio between the absorption coefficients associated to the dye molecule and to whole film. This can be also expressed as the ratio between the absorbance associated to the dye molecule ( $A_{dye}$ ) and the absorbance of the film ( $A_{film}$ ) (Eq. S5)

$$\frac{I_{A(dye)}}{I_{A(film)}} = \frac{\alpha_{dye}}{\alpha_{film}} = \frac{A_{dye}}{A_{film}}$$

(S5)

By substituting (S5) in (S1) we obtain the expression used to determine the quantum yield of the trapped dye molecules (S6). Determination of the absorbance associated to the dye molecule ( $A_{dye}$ ) is discussed in the next epigraph.

$$\phi = \eta \cdot \left( \frac{A_{film}}{A_{dye}} \right)$$

(S6)

### S3. Estimation absorbance associated to the dye molecules.

As can be observed in Fig. S2 the absorption band of the dye molecule is superimposed on a continuous UV absorption that is related to the  $\pi \rightarrow \pi^*$  transition in the unsaturated bonds

of the polymeric matrix. In order to determine the absorbance associated to the dye molecule trapped within the films, we have estimated, for each sample, a transmittance spectra corresponding to the non-luminescent polymeric matrix that contains the dye molecules. In Fig. S2 is presented, as example, the transmittance function ( $T_M$ ) assumed for the polymeric matrix of sample 3HF-6. According to the formula (S7) derived from the Beer-Lambert law, the ratio between the transmittance of the sample  $T_{film}$  and the transmittance of the polymeric matrix  $T_M$  provides the absorbance  $A_{3-HF}$  associated to the luminescent 3-HF molecules embedded in the film.

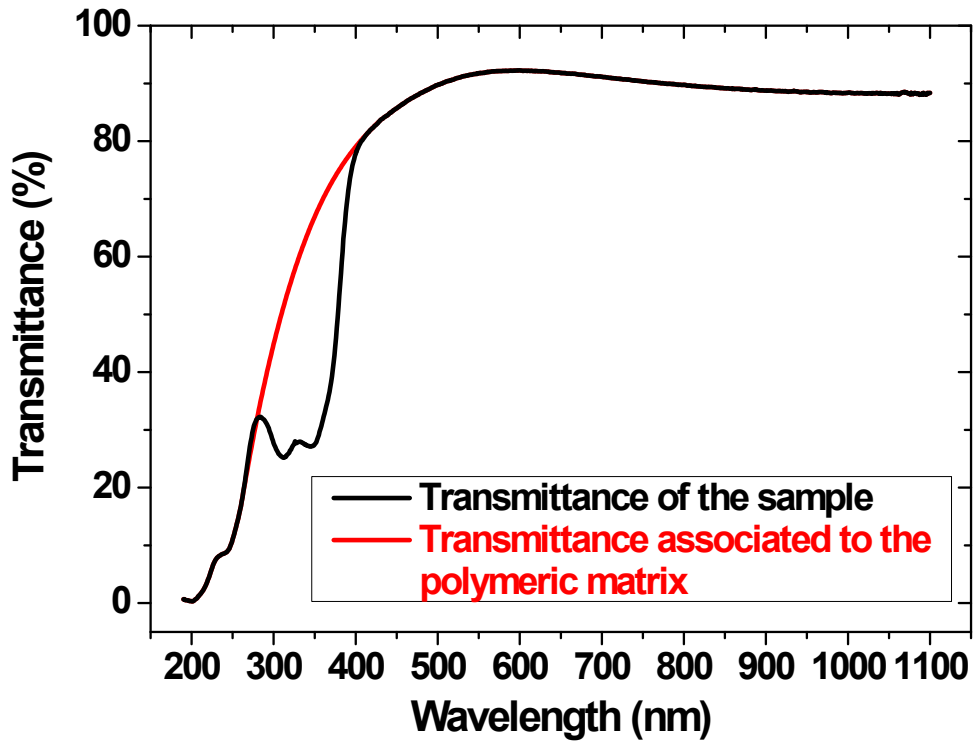

**Fig. S2.** Transmittance spectrum associated to the non-luminescent polymeric matrix where the 3-HF molecules are embedded.

$$A_{dye} = \log_{10}\left(\frac{T_{film}}{T_M}\right) \quad (S7)$$

#### S4. Attribution of IR features.

**Table S1.** IR bands observed in the 3-HF powder spectrum.<sup>2-7</sup>

| Position (cm <sup>-1</sup> ) | Group                    | Vibration Mode                           |
|------------------------------|--------------------------|------------------------------------------|
| 3210                         | -O-H<br>C-H <sub>x</sub> | Stretching                               |
| 1609                         | C=O                      | Stretching                               |
|                              | C=C                      | Skeletal vibration in the aromatic rings |
| 1561                         | C=O                      | Stretching                               |
|                              | C=C                      | Skeletal vibration in the aromatic rings |
| 1481                         | C=C                      | Skeletal vibration in the aromatic rings |
| 1463                         | C=C                      | Skeletal vibration in the aromatic rings |
| 1418                         | -OH                      | Bending                                  |
|                              | C-H                      | In plane bending                         |
| 1352                         | -OH                      | In plane bending                         |
| 1307                         | -OH                      | Bending                                  |
|                              | C-H                      | In plane bending                         |
| 1284                         | -OH                      | Bending                                  |
|                              | C-H                      | In plane bending                         |
| 1211                         | C-OH                     | Stretching                               |
|                              | C-H                      | In plane bending                         |
| 1129                         | C-H                      | In plane bending                         |
| 1077                         | C-H                      | In plane bending                         |
| 1035                         | C-H                      | In plane bending                         |
| 989                          | C-C                      | Deformation                              |
| 896                          | -OH                      | Bending                                  |
|                              | C-C                      | Deformation                              |
| 780                          | C-H                      | Out of plane bending of 4 adjacent H     |

|     |       |                                      |
|-----|-------|--------------------------------------|
| 760 | C-H   | Out of plane bending of 4 adjacent H |
| 706 | C-O-C | Stretching                           |
|     | C-C   | Deformation                          |
| 688 | C-O-C | Stretching                           |
|     | C-C   | Deformation                          |

**Table S2.** Additional bands in the IR spectra of the PAVD films.<sup>6,8,9</sup>

| Position (cm <sup>-1</sup> ) | Group            | Vibration Mode                                                                 |
|------------------------------|------------------|--------------------------------------------------------------------------------|
| 3350                         | -OH              |                                                                                |
| 3065                         | C-H              | Stretching in aromatic rings                                                   |
| 3035                         | C-H              | Stretching in unsaturated aliphatic groups                                     |
| 2960                         | C-H <sub>3</sub> | Stretching                                                                     |
| 2935                         | C-H <sub>2</sub> | Stretching in saturated aliphatic groups                                       |
| 2875                         | C-H <sub>3</sub> | Stretching                                                                     |
| 1750                         | C=O              | Stretching in saturated aliphatic esters                                       |
| 1720                         | C=O              | Stretching in saturated aliphatic ketones and aldehydes and unsaturated esters |
| 1700                         | C=O              | Stretching in unsaturated groups (ketones aldehydes and carboxyls)             |
| 1650                         | C=O              | Stretching in aryl ketones                                                     |
|                              | C=C              | Stretching in conjugated systems                                               |

**S5. Excitation spectra of 3-HF containing PAVD films.**

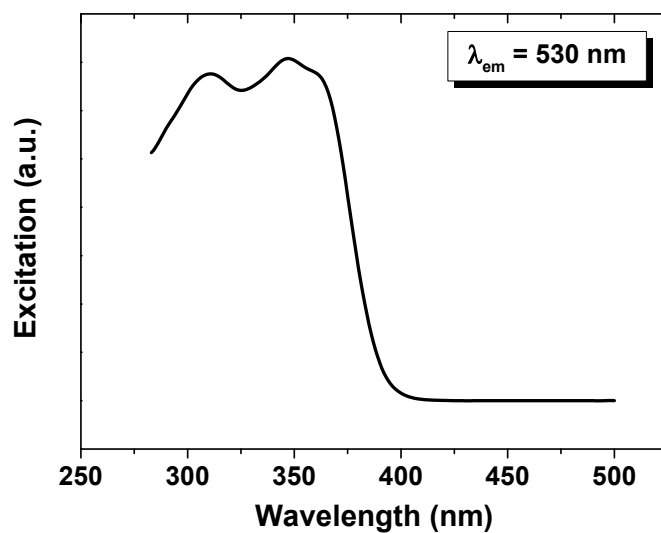

Fig. S3. Normalized excitation spectrum ( $\lambda_{ex} = 530 \text{ nm}$ ) of a 3HF-6 PAVD films.

S6. Transmission spectra of 3-HF films as a function of the thickness.

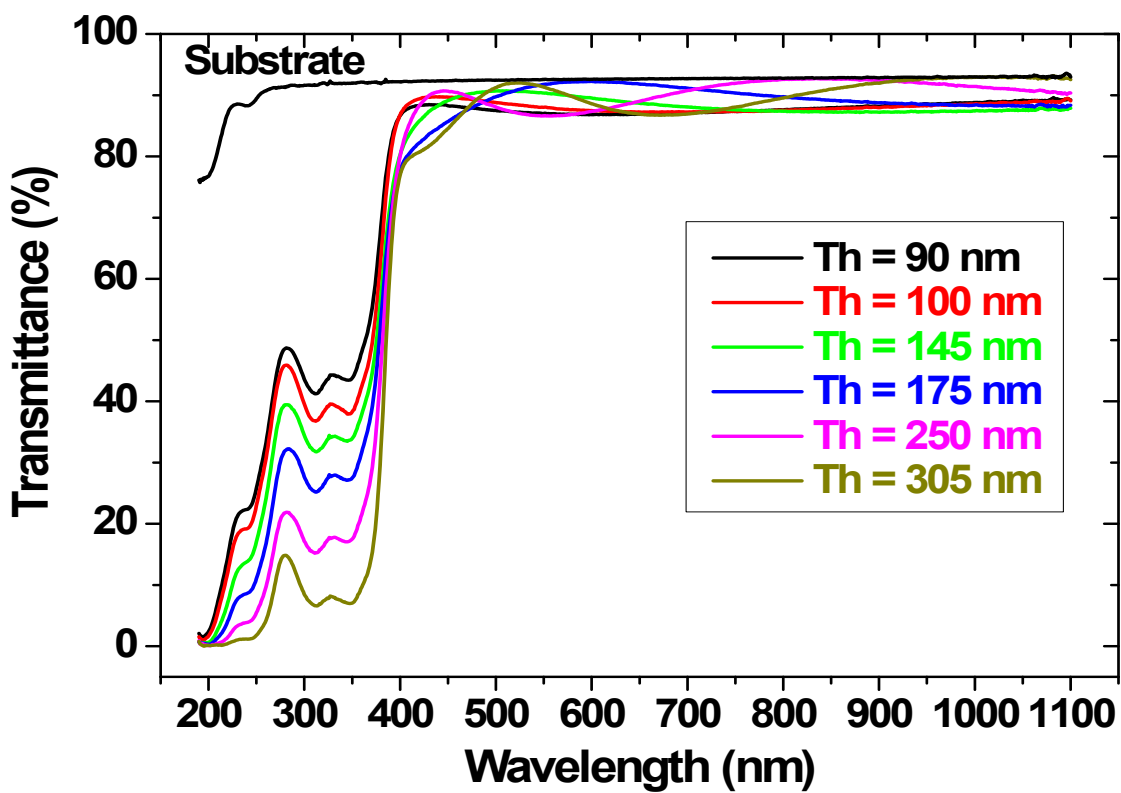

**Fig. S4.** UV-vis spectra of a set of 3HF-6 films (cf. Table 1 in the text) as a function of thickness. Transmittance spectrum of a fused silica substrate is also included.

### **S7. Relevant factors driving the quantum yield of the green emission of 3-Hydroxyflavone.**

Fig. S5 shows a schematic diagram of the relevant energy levels and processes involved in the fluorescence emission of the T species of the 3-hydroxyflavone. According to it, when the molecule absorbs a UV photon it becomes promoted to the N\* and from there to the T\* excited state, through an ESIPT process. Once in the T\* excited state, the molecule may decay to the T ground state by both radiative and non radiative process. Assuming this diagram the quantum yield of the green emission would be proportional to the efficiency of both the ESIPT and the radiative deactivation process from the T\* state. Formally, we can write the following expression (S8) accounting for the two contributions:

$$\Phi \propto \Gamma_{ESIPT} \cdot \left( \frac{k_R}{k_R + k_{NR}} \right) = \Gamma_{ESIPT} \cdot (k_R \cdot \tau) \quad (S8)$$

where  $\Gamma_{ESIPT}$  is the efficiency of the ESIPT process,  $k_R$  and  $k_{NR}$  are the rate constants of the radiative and non-radiative decays of the T\* emitting state and  $\tau$  is the life time of the T emission. Note that in this expression  $(k_R \cdot \tau)$  provides the efficiency of the radiative decay process from the T\* state.



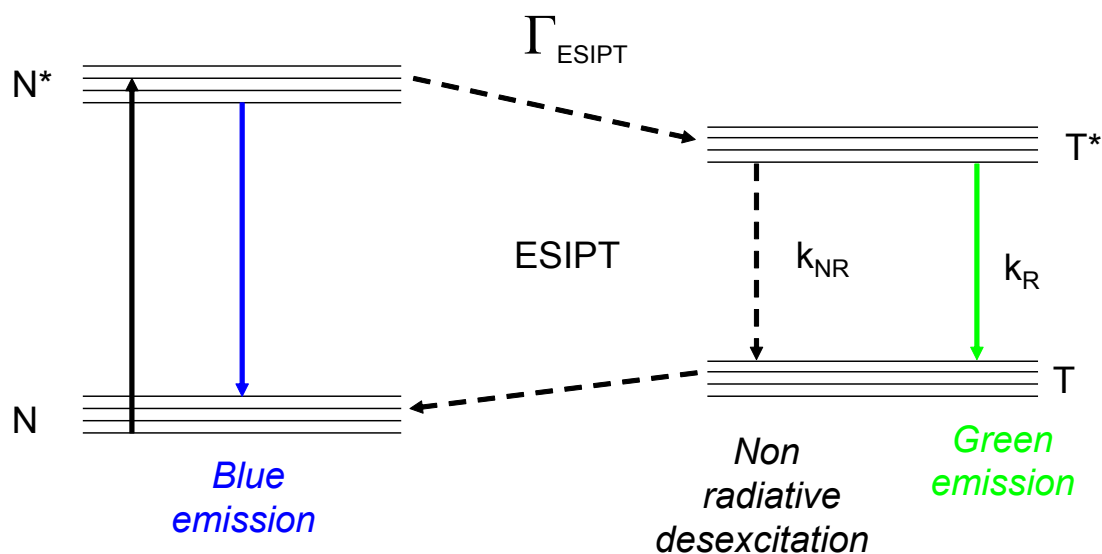

**Fig. S5.** Relevant energy levels and process involved in the fluorescence emission of the T\* specie of the 3-hydroxyflavone.

## References

1. J. C. de Mello, H. F. Wittmann and R. H. Friend, *Adv. Mater.*, 1997, **9**, 230-232.
2. M. Wang, T. Teslova, F. Xu, T. Spataru, J. R. Lombardi, R. L. Birke and M. Leona, *J. Phys. Chem. C*, 2007, **111**, 3038-3043.
3. A. Vavra, R. Linder and K. Kleinermanns, *Chem. Phys. Lett.*, 2008, **463**, 349-352.
4. G. Maggioni, S. Carturan, A. Quaranta, A. Patelli and G. Della Mea, *Chem. Mater.*, 2002, **14**, 4790-4795.
5. J. H. Looker and W. W. Hanneman, *The Journal of Organic Chemistry*, 1962, **27**, 381-389.
6. G. Sokrates, *Infrared Characteristic Group Frequencies: Tables and Charts*, Wiley-Interscience, New York, 1994.
7. M. Buffa, S. Carturan, A. Quaranta, G. Maggioni and G. Della Mea, *Opt. Mater.*, 2012, **34**, 1219-1224.
8. A. H. Kuptsov and G. N. Zhizhi, *Handbook of Fourier transform Raman and infrared spectra of polymers*, Elsevier, Amsterdam, 1998.
9. J. Ristein, R. T. Stief, L. Ley and W. Beyer, *J. Appl. Phys.*, 1998, **84**, 3836-3847.
